# Supplementary material for: Enhanced photoexcited carrier separation in CdS–SnS2 heteronanostructures: a new 1D–0D visible-light photocatalytic system for the hydrogen evolution reaction
Source: Royal Society of Chemistry journal article supplement (doi:10.1039/c9ta03059j), 2019-01-01
Supplement: c9ta03059j1.pdf [file c9ta03059j1.pdf]

## **Supporting Information**

### **Enhanced photoexcited carrier separation in CdS-SnS<sub>2</sub> heteronanostructures: A new 1D-0D visible photocatalytic system for hydrogen evolution reaction**

Rama Krishna Chava\*, Jeong-Yeon Do, Misook Kang\*\*

Department of Chemistry, College of Natural Science, Yeungnam University,

280 Daehak-Ro, Gyeongsan, Gyeongbuk-38541, Republic of Korea.

#### **Corresponding Author's Address:**

\*Dr. Rama Krishna Chava (Email: [drerkphysics@hotmail.com](mailto:drerkphysics@hotmail.com), [rama@ynu.ac.kr](mailto:rama@ynu.ac.kr))

\*\*Prof. Misook Kang (Email: [mskang@ynu.ac.kr](mailto:mskang@ynu.ac.kr))

Department of Chemistry, College of Natural Science, Yeungnam University, 280 Daehak-Ro,  
Gyeongsan, Gyeongbuk-38541, Republic of Korea.

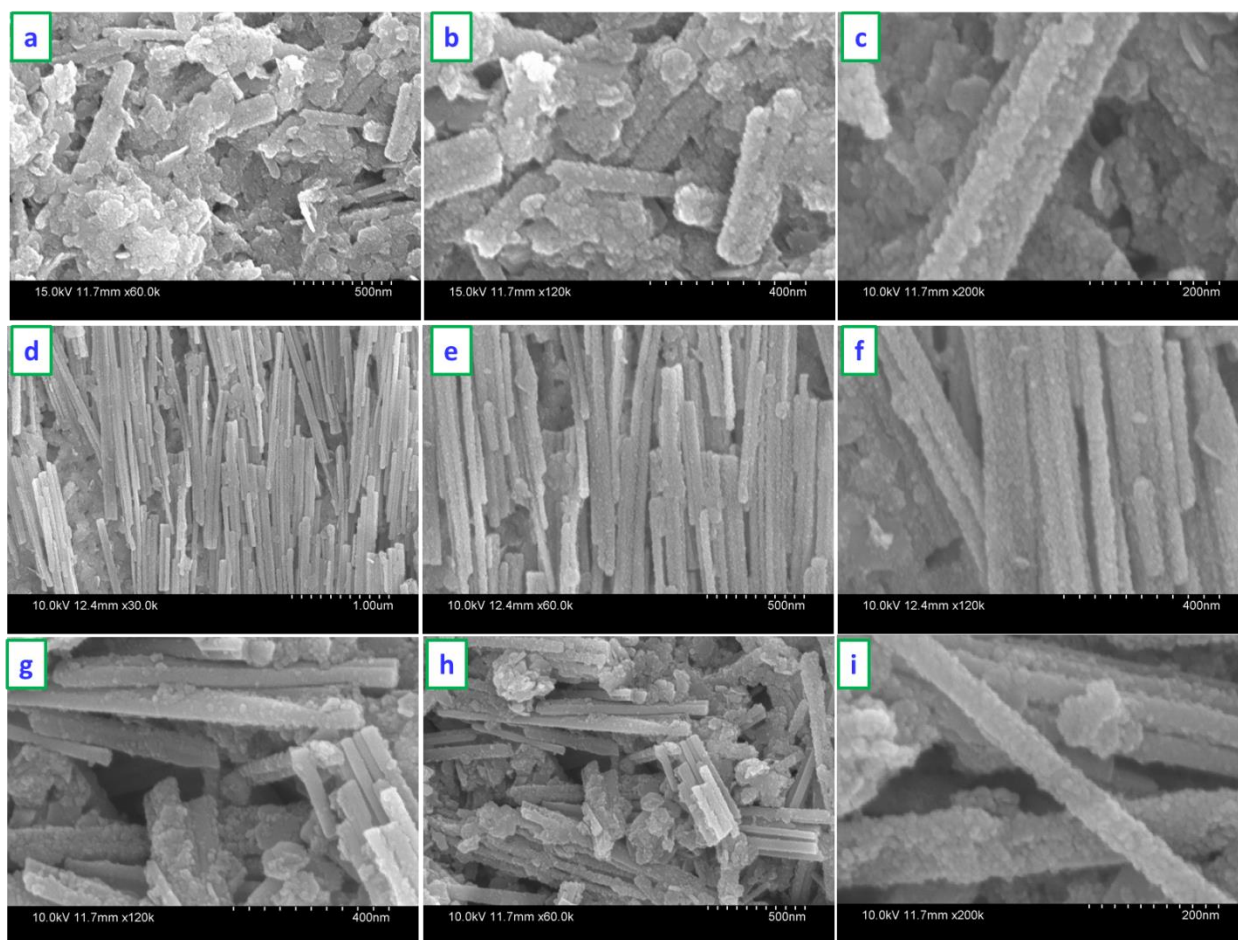

**Figure S1.** FE-SEM images of synthesized photocatalyst samples, (a-c) CS-20, (d-f) CS-40, (g-i) CS-50 core-shell HNSs.

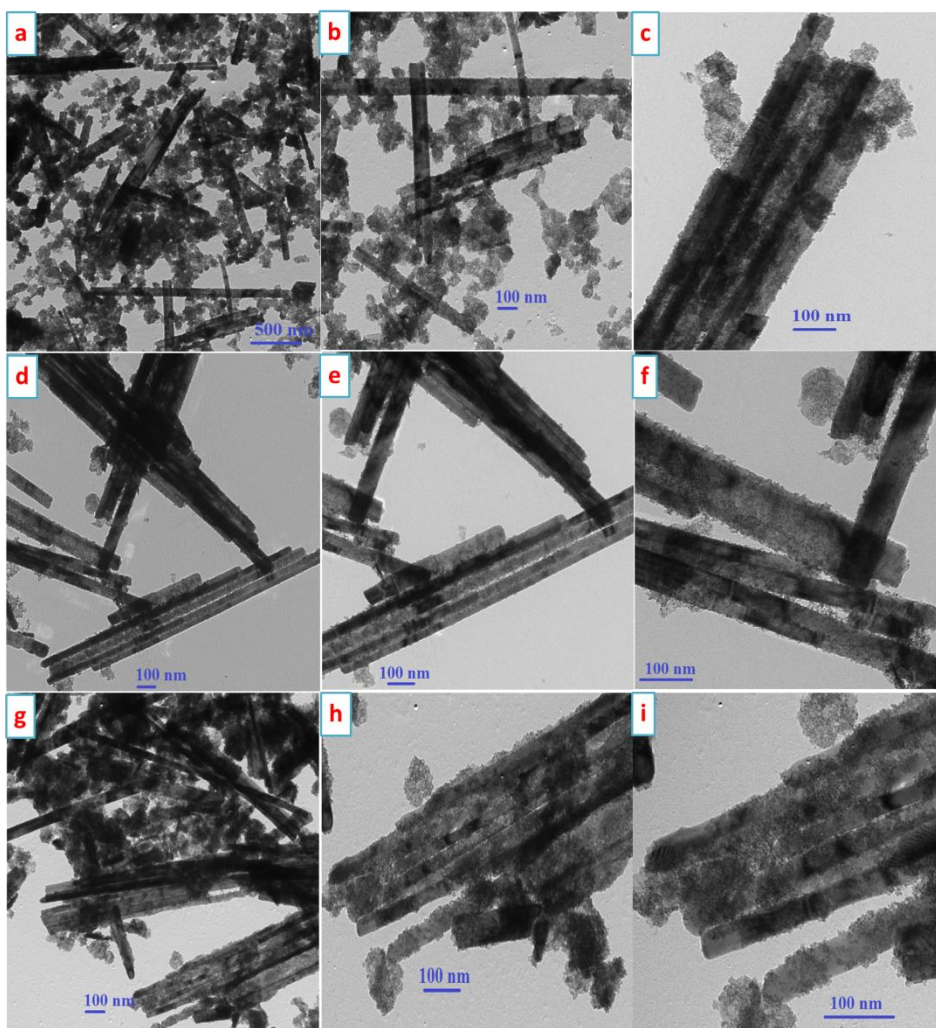

**Figure S2.** TEM images of (a-c) CS-20, (d-f) CS-40, (g-i) CS-50 HNSs core-shell HNSs.

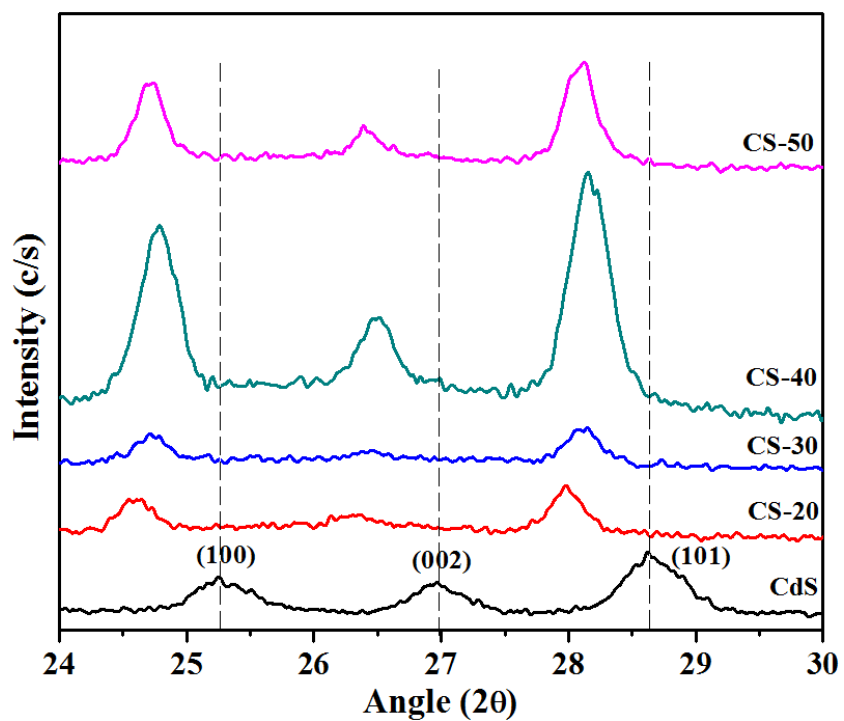

**Figure S3:** Powder X-ray diffraction patterns of CdS and CdS-SnS<sub>2</sub> CSHNSs in the range of 24 °-30° demonstrating the left shift of (100), (002) and (101) planes after making heterostructures.

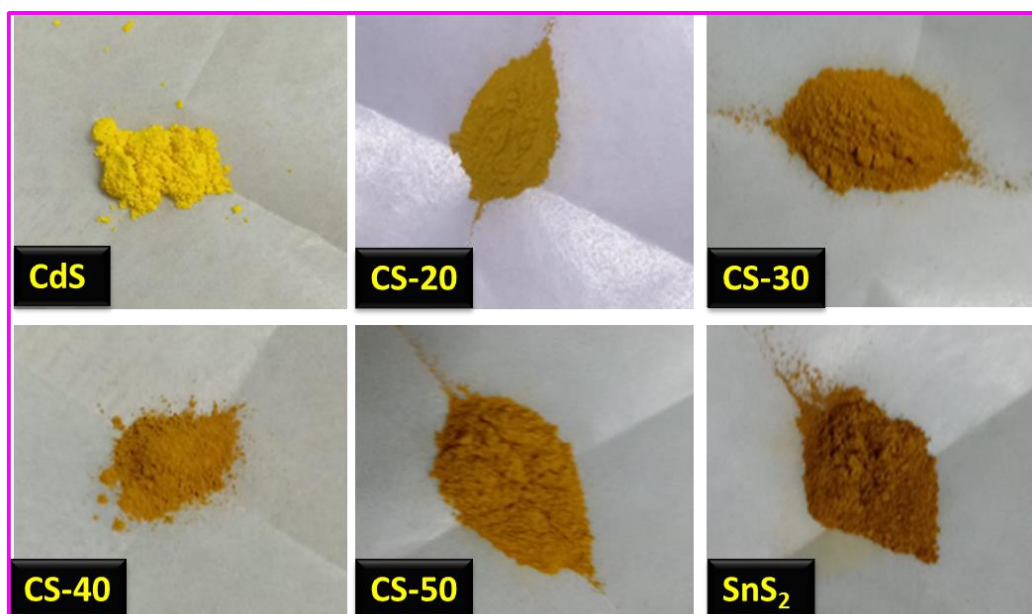

**Figure S4:** Digital images of as prepared CdS, CdS-SnS<sub>2</sub> and SnS<sub>2</sub> photocatalysts samples.

**Table S1:** The EIS fitted parameters for the studied photocatalyst samples

| Sample           | $R_s$ (Ohm)         | $R_{ct}$ (Ohm)      |
|------------------|---------------------|---------------------|
| CdS              | $3.019 \times 10^3$ | $1.740 \times 10^5$ |
| SnS <sub>2</sub> | $6.543 \times 10^2$ | $3.788 \times 10^4$ |
| CS-30            | $5.011 \times 10^2$ | $1.053 \times 10^4$ |

**Table S2:** Comparison of H<sub>2</sub> evolution activities of 1D CdS based heterostructures.

| <b>Catalyst</b>                                          | <b>Light source<br/><math>\lambda &gt; 420</math> nm</b> | <b>H<sub>2</sub> evolution rate<br/>(mmol.g<sup>-1</sup>.h<sup>-1</sup>)</b> | <b>Quantum<br/>Efficiency</b> | <b>Ref.</b> |
|----------------------------------------------------------|----------------------------------------------------------|------------------------------------------------------------------------------|-------------------------------|-------------|
| CdS/CoO <sub>x</sub>                                     | 350 W Xe lamp                                            | 3.5                                                                          | --                            | S1          |
| CdS-Au/MoS <sub>2</sub>                                  | 150 W Xe lamp                                            | 7                                                                            | 27.85%                        | S2          |
| CdS-MoS <sub>2</sub>                                     | 300 W Xe lamp                                            | 49.80                                                                        | 41.37%                        | S3          |
| CdS-WS <sub>2</sub>                                      | ---                                                      | 61.1                                                                         | 28.9%                         | S4          |
| CdS-CdIn <sub>2</sub> S <sub>4</sub>                     | 300 W Xe lamp                                            | 0.823                                                                        | 1.2%                          | S5          |
| CdS- $\beta$ -NiS                                        | 300 W Xe lamp                                            | 793.6 $\mu$ mol.h <sup>-1</sup>                                              | 74.11%                        | S6          |
| CdS-Co(OH) <sub>2</sub>                                  | 350 W Xe lamp                                            | 14.43                                                                        | --                            | S7          |
| CdS-Pt                                                   | 350 W Xe lamp                                            | 1.49 mmol. h <sup>-1</sup>                                                   | 6.70%                         | S8          |
| CdS-MoS <sub>2</sub>                                     | 300 W Xe lamp                                            | 60.28                                                                        | 50.07%                        | S9          |
| CdS-MoS <sub>x</sub>                                     | 300 W Xe lamp                                            | 404 $\mu$ mol.h <sup>-1</sup>                                                | --                            | S10         |
| CdS-MoS <sub>2</sub> -graphene                           | 350 W Xe lamp                                            | 621.3 $\mu$ mol.h <sup>-1</sup>                                              | 54.4%                         | S11         |
| CdS-Pd                                                   | ---                                                      | 71.0                                                                         | --                            | S12         |
| CdS-MoS <sub>2</sub>                                     | 300 W Xe lamp                                            | 9.73                                                                         | 60.3%                         | S13         |
| CdS-MoS <sub>2</sub>                                     | 300 W Xe lamp                                            | 12.38                                                                        | --                            | S14         |
| CdS-WS <sub>2</sub> -MoS <sub>2</sub>                    | 150 W Xe lamp                                            | 169.82                                                                       | 51.4%                         | S15         |
| CdS-ZnO                                                  | 300 W Xe lamp                                            | 9.618                                                                        | --                            | S16         |
| CdS-MoS <sub>2</sub>                                     | 300 W Xe lamp                                            | 10.85                                                                        | 22.0%                         | S17         |
| CdS-g-C <sub>3</sub> N <sub>4</sub>                      | 300 W Xe lamp                                            | 44.450                                                                       | 46.3%                         | S18         |
| CdS-g-C <sub>3</sub> N <sub>4</sub> -Ni(OH) <sub>2</sub> | 300 W Xe lamp                                            | 0.115                                                                        | 16.7%                         | S19         |
| CdS-SnS <sub>2</sub>                                     | 150 W Xe lamp                                            | 35.65                                                                        | 18.45%                        | This work   |

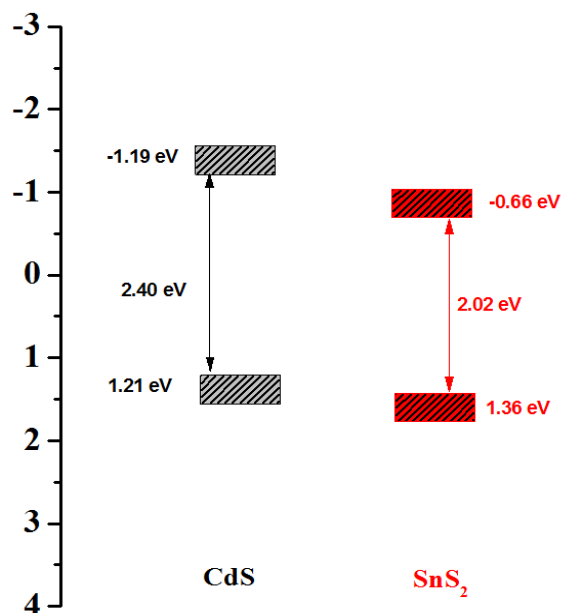

**Figure S5:** Electronic band structures of CdS and SnS<sub>2</sub> nanostructures.

## References

- S1 Y. Liu, S. P. Ding, Y. Q. Shi, X. F. Liu, Z. Z. Wu, Q. Q. Jiang, T. F. Zhou, N. K. Liu and J. C. Hu, *Appl. Catal., B*, 2018, **234**, 109–116.
- S2 R. K. Chava, J. Y. Do and M. Kang, *ACS Sustainable Chem. Eng.*, 2018, **6**, 6445–6457.
- S3 X. –L. Yin, L. –L. Li, W. –J. Jiang, Y. Zhang, X. Zhang, L. –J. Wan and J. –S. Hu, *ACS Appl. Mater. Interfaces*, 2016, **8**, 15258–15266.
- S4 J. He, L. Chen, Z.-Q. Yi, C.-T. Au and S.-F. Yin, *Ind. Eng. Chem. Res.*, 2016, **55**, 8327–8333.
- S5 T. Wang, Y. Y. Chai, D. K. Ma, W. Chen, W. W. Zheng and S. M. Huang, *Nano Res.*, 2017, **10**, 2699–2711.
- S6 S. D. Guan, X. L. Fu, Y. Zhang and Z. J. Peng, *Chem. Sci.*, 2018, **9**, 1574–1585.
- S7 X. Zhou, J. Jin, X. J. Zhu, J. Huang, J. G. Yu, W. –Y. Wong and W. –K. Wong, *J. Mater. Chem. A*, 2016, **4**, 5282–5287..

- S8 J. Jin, J. G. Yu, G. Liu and P. K. Wong, *J. Mater. Chem. A*, 2013, **1**, 10927–10934.
- S9 X. -L. Yin, G.-Y. He, B. Sun, W.-J. Jiang, D.-J. Xue, A.-D. Xia, L.-J. Wan and J.-S. Hu, *Nano Energy*, 2016, **28**, 319–329.
- S10 X. L. Fu, L. Zhang, L. H. Liu, H. Li, S. G. Meng, X. G. Ye, and S. F. Chen, *J. Mater. Chem. A*, 2017, **5**, 15287–15293.
- S11 D. Lang, T.T. Shen and Q. J. Xiang, *ChemCatChem*, 2015, **7**, 943 – 951.
- S12 H. Park, D. A. Reddy, Y. J. Kim, S. H. Lee, R. Ma and T. K. Kim, *Chem. Eur. J.* 2017, **23**, 13112-13119.
- S13 Y. Li, L. L. Wang, T. Cai, S. Q. Zhang, Y. T. Liu, Y. Song, X. Dong, and L. Hu, *Chem. Eng. J.*, 2017, **321**, 366–374.
- S14 C. Feng, Z. Y. Chen, J. Hou, J. Li, X. B. Li, L. K. Xu, M. X. Sun and R. C. Zeng, *Chem. Eng. J.*, 2018, **345**, 404-413.
- S15 D. A. Reddy, H. Park, R. Ma, D. P. Kumar, M. Lim and T. K. Kim, *ChemSusChem*, 2017, **10**, 1563-1570.
- S16 S. Tso, W. -S. Li, B. -H. Wu and L. -J. Chen, *Nano Energy*, 2018, **43**, 270-277.
- S17 H. F. Lin, Y. Y. Li, H. Y. Li and X. Wang, *Nano Res.*, 2017, **10**, 1377-1392.
- S18 T.F. Wu, P. F. Wang, J. Qian, Y.H. Ao, C. Wang and J. Hou, *Dalton Trans.*, 2017, **46**, 13793–13801.
- S19 Z. P. Yan, Z. J. Sun, X. Liu, H. X. Jia and P. W. Du, *Nanoscale*, 2016, **8**, 4748-4756.
